# Supplementary material
Source: PubMed Central journal article supplement (PMC3496871)
Supplement: NIHMS417173-supplement-esi.pdf [file NIHMS417173-supplement-esi.pdf]

## Supporting Information

### Biochemical and structural analysis of aminoglycoside acetyltransferase Eis from *Anabaena variabilis*

Rachel E. Pricer,<sup>a,b</sup> Jacob L. Houghton,<sup>a,c</sup> Keith D. Green,<sup>a</sup> Abdelrahman S. Mayhoub,<sup>a£</sup> and Sylvie Garneau-Tsodikova<sup>\*a,b,c</sup>

<sup>a</sup>Life Sciences Institute, <sup>b</sup>Chemical Biology Doctoral Program University of Michigan, and <sup>c</sup>Department of Medicinal Chemistry in the College of Pharmacy, 210 Washtenaw Ave, Ann Arbor, MI 48109, USA. <sup>£</sup>On leave from Faculty of Pharmacy, Al-Azhar University, Cairo, 11884, Egypt.

Correspondence to: Fax: +1 734-615-5521; Tel: +1 734-615-2736; E-mail: sylviegt@umich.edu.

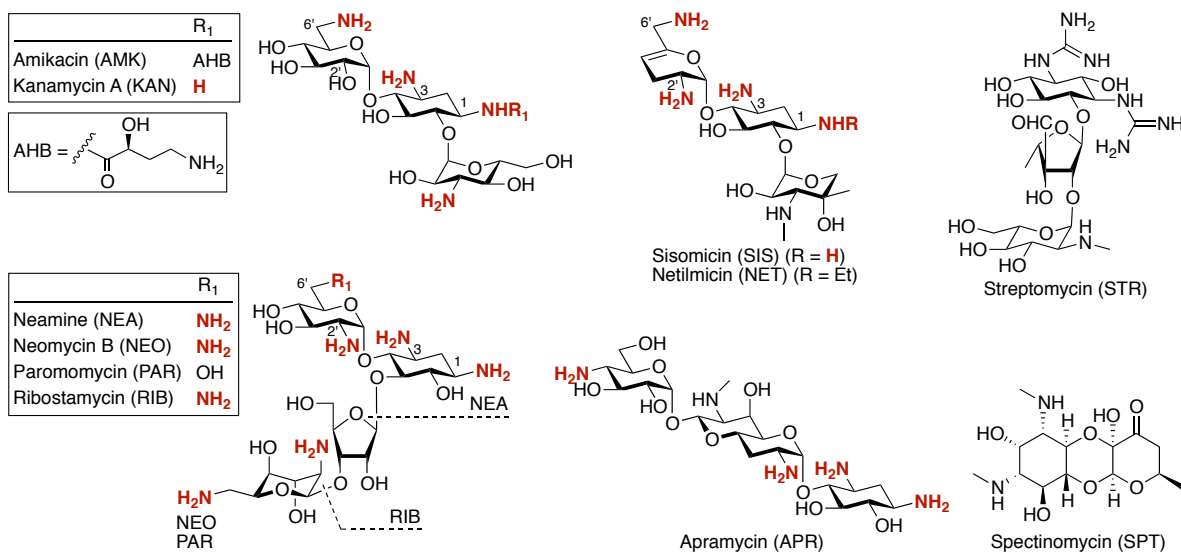

**Fig. S1.** Structures of aminoglycosides (AGs) tested in this study. The amine functionalities that could potentially be modified by Eis proteins are highlighted in bold red.

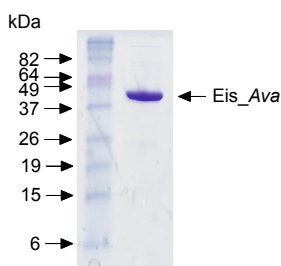

**Fig. S2.** 15% Coomassie blue-stained SDS-PAGE of purified Eis\_Ava.

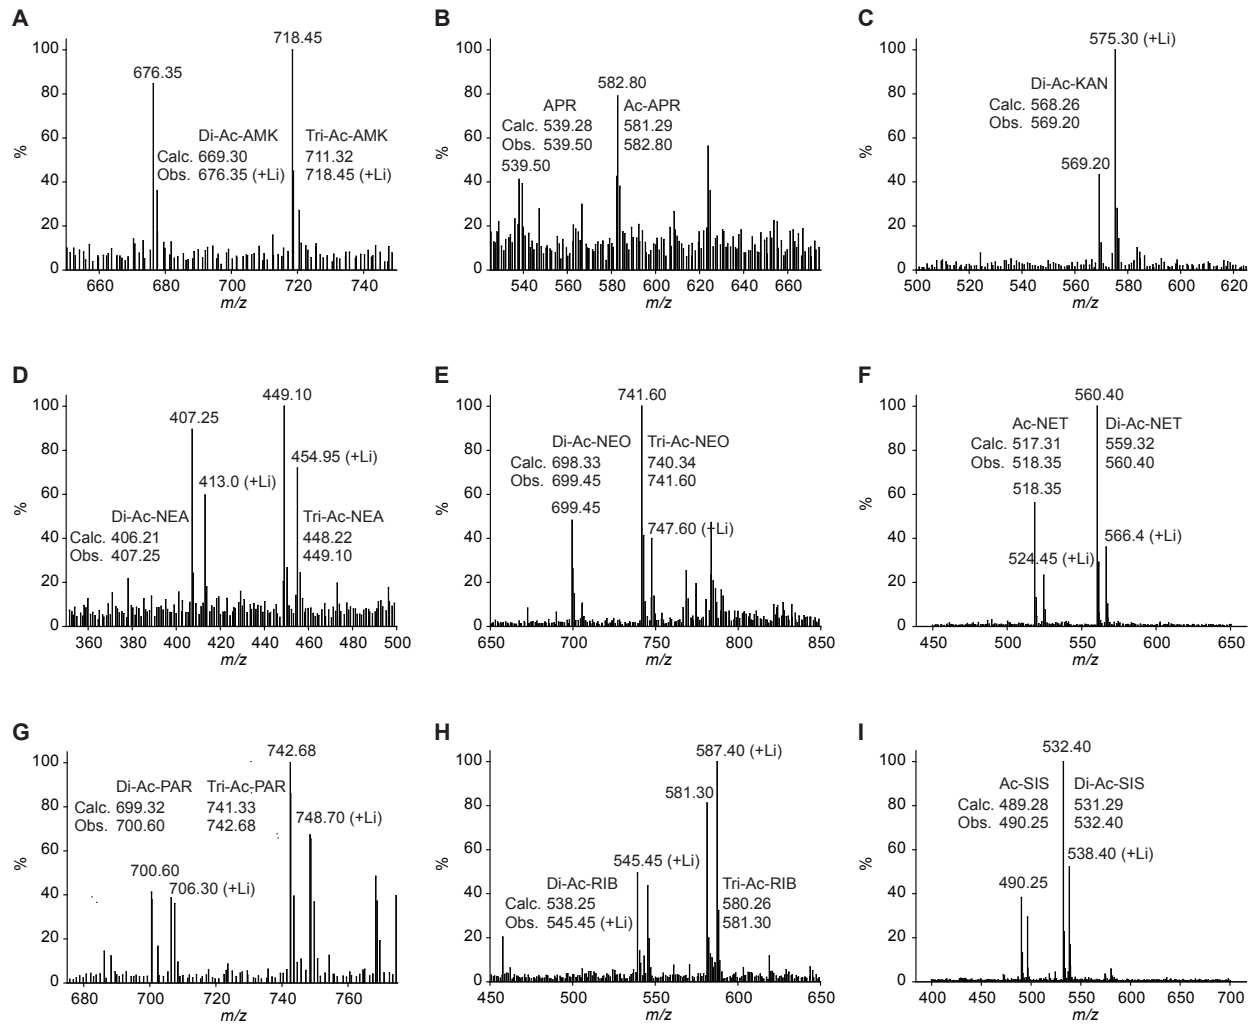

**Fig. S3.** Mass spectra of AGs multi-acetylated by *Eis\_Ava*.

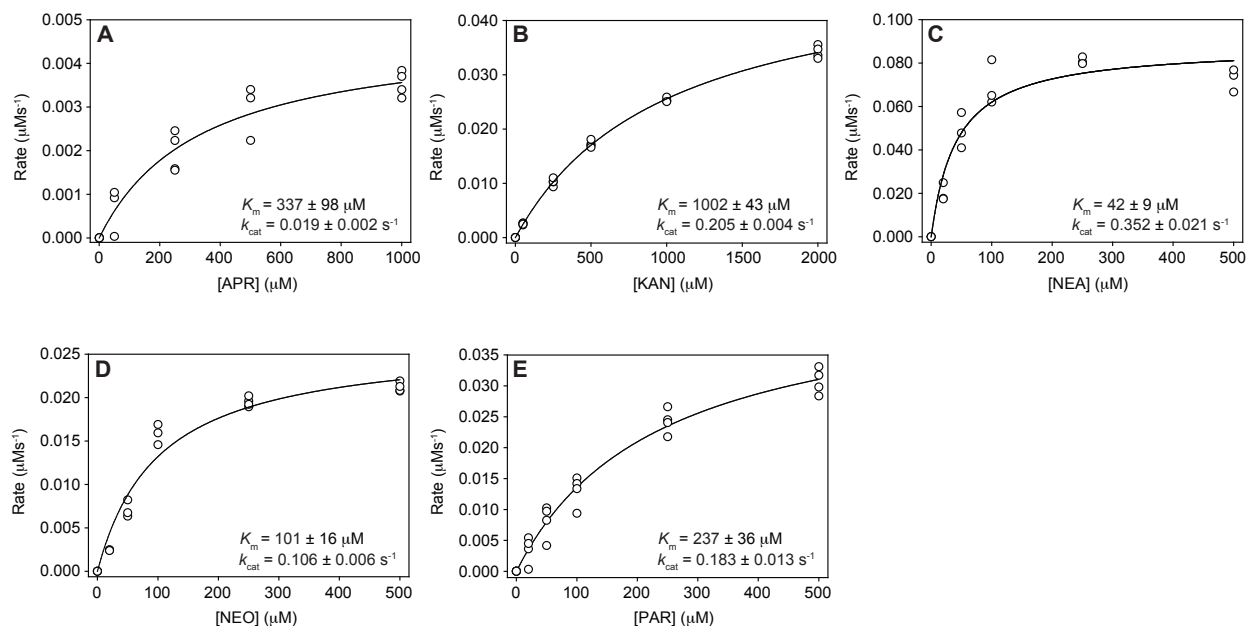

**Fig. S4.** Michaelis-Menten analysis of the Eis\_Ava catalyzed acetylation of **A.** APR, **B.** KAN, **C.** NEA, **D.** NEO, and **E.** PAR.

**Table S1.** Proton chemical shifts determined for NEA and 1,2'-di-acetyl-NEA.<sup>a</sup>

| Ring   | H position                        | NEA                                                                                      | 1,2'-di-acetyl-NEA                                                              | $\Delta$ ppm |
|--------|-----------------------------------|------------------------------------------------------------------------------------------|---------------------------------------------------------------------------------|--------------|
| II     | 1                                 | 2.91-2.88 <sup>b</sup> (m) [2.89] <sup>d</sup>                                           | 3.70-3.84 (m) [3.77]                                                            | <b>0.88</b>  |
|        | 2 <sub>ax</sub>                   | 1.33 (ddd (app. q), $J_{2ax,2eq} = J_{2ax,1} = J_{2ax,3} = 12.0$ Hz) <sup>e</sup>        | 1.72 (ddd (app. q), $J_{2ax,2eq} = J_{2ax,1} = J_{2ax,3} = 13.0$ Hz)            | 0.39         |
|        | 2 <sub>eq</sub>                   | 2.08 (ddd (app. dt), $J_{2eq,2ax} = 12.0$ Hz, $J_{2eq,1} = J_{2eq,3} = 4.0$ Hz)          | 2.25 (ddd (app. dt), $J_{2eq,2ax} = 13.0$ Hz, $J_{2eq,1} = J_{2eq,3} = 4.1$ Hz) | 0.17         |
|        | 3                                 | 2.96 <sup>b</sup> (ddd, $J_{3,2eq} = 4.0$ Hz, $J_{3,2ax} = 12.0$ Hz, $J_{3,4} = 9.5$ Hz) | 3.33-3.41 (m) [3.38]                                                            | 0.42         |
|        | 4                                 | 3.35 <sup>c</sup> (dd, (app. q) $J_{4,3'} = J_{4,5'} = 9.5$ )                            | 3.91-3.79 (m) [3.82]                                                            | 0.45         |
|        | 5                                 | 3.59-3.55 (m) [3.57]                                                                     | 3.66-3.58 (m) [3.62]                                                            | 0.05         |
| 6      | 3.29-3.23 <sup>c</sup> (m) [3.26] | 3.51-3.37 (m) [3.42]                                                                     | 0.16                                                                            |              |
| I      | 1'                                | 5.42 (d, $J_{1',2'} = 4.0$ Hz)                                                           | 5.76 (d, $J_{1',2'} = 3.8$ Hz)                                                  | 0.34         |
|        | 2'                                | 2.87 (dd, $J_{2',1'} = 4.0$ Hz, $J_{2',3'} = 10.5$ Hz)                                   | 4.01-3.93 (m) [3.98]                                                            | <b>1.11</b>  |
|        | 3'                                | 3.63 (dd (app. t), $J_{3',4'} = 9.5$ Hz, $J_{3',2'} = 10.5$ Hz)                          | 3.92-3.85 (m) [3.89]                                                            | 0.26         |
|        | 4'                                | 3.35 (dd, (app. q) $J_{4',3'} = J_{4',5'} = 9.5$ )                                       | 3.51-3.37 (m) [3.44]                                                            | 0.09         |
|        | 5'                                | 3.91 (ddd, $J_{5',4'} = 9.5$ Hz, $J_{5',6'a} = 7.5$ Hz, $J_{5',6'b} = 3.0$ Hz)           | 4.01-3.93 (m) [3.96]                                                            | 0.05         |
|        | 6' <sub>a</sub>                   | 3.04 (dd, $J_{6'a,6'b} = 14.0$ Hz, $J_{6'a,5'} = 7.5$ Hz)                                | 3.22 (dd, $J_{6'a,6'b} = 13.0$ Hz, $J_{6'a,5'} = 7.5$ Hz)                       | 0.18         |
|        | 6' <sub>b</sub>                   | 3.29-3.23 (m) [3.25]                                                                     | 3.51-3.37 (m) [3.49]                                                            | 0.24         |
| Acetyl | NH-2'                             | ×                                                                                        | 8.30 (d, $J_{NH,2} = 8.0$ Hz)                                                   |              |
|        | NH-1                              | ×                                                                                        | 8.24-8.14 (m) [8.20]                                                            |              |
|        | CH <sub>3</sub> C=O on 2'         | ×                                                                                        | 2.05 (s)                                                                        |              |
|        | CH <sub>3</sub> C=O on 1          | ×                                                                                        | 1.97 (s)                                                                        |              |

<sup>a</sup>The chemical shift were established based on <sup>1</sup>H, zTOCSY, gCOSY, and gHSQC NMR (500 MHz). <sup>b</sup>Could be analogous position of the 2-deoxystreptamine (DOS) ring. <sup>c</sup>Multiplicity and  $J$  are given in (). <sup>d</sup>The numbers in [] were determined from gCOSY and/or zTOCSY. <sup>e</sup>Could be analogous position of the DOS ring. ×Indicates that the acetyl moiety is not present in the molecule.

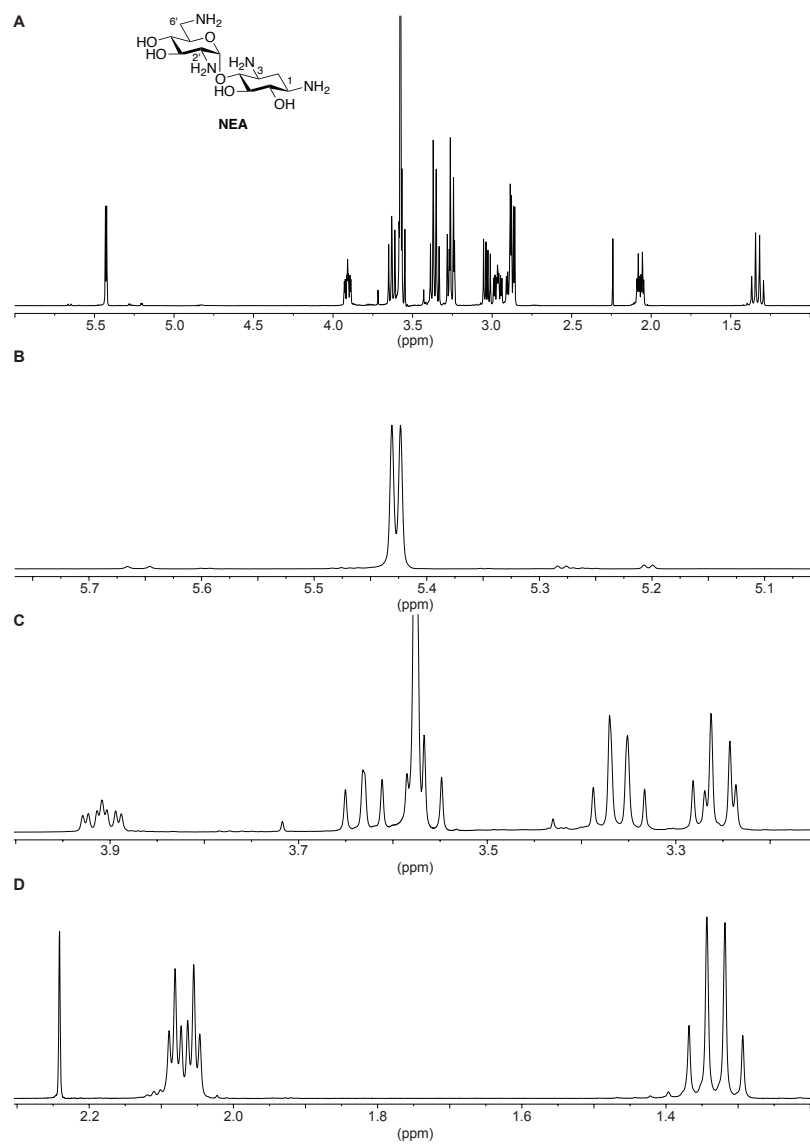

**Fig. S5.**  $^1\text{H}$  NMR of NEA in 1.2:8.8/ $\text{D}_2\text{O}:\text{H}_2\text{O}$  at pH 7.5 (500 MHz). The full spectrum is shown in panel **A** and the expansions in panels **B-D**.

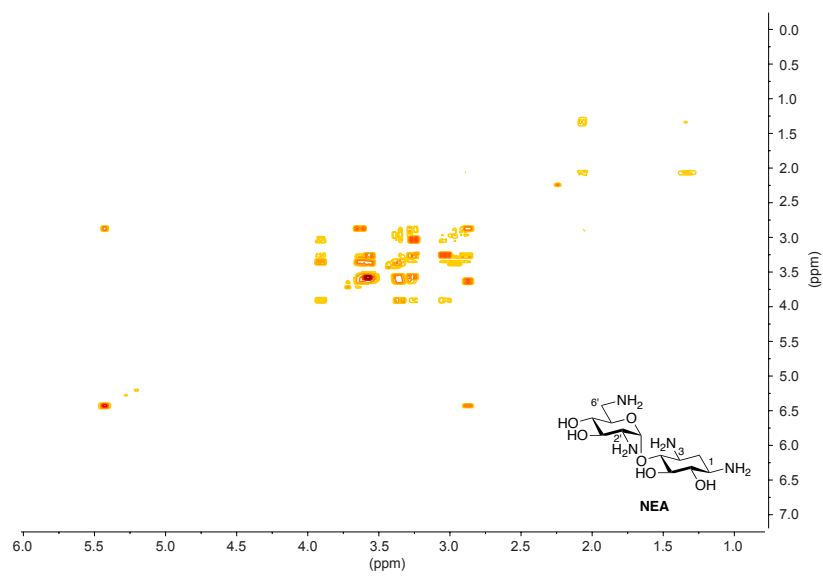

**Fig. S6.** gCOSY of NEA in 1.2:8.8/ $\text{D}_2\text{O}$ : $\text{H}_2\text{O}$  at pH 7.5 (500 MHz).

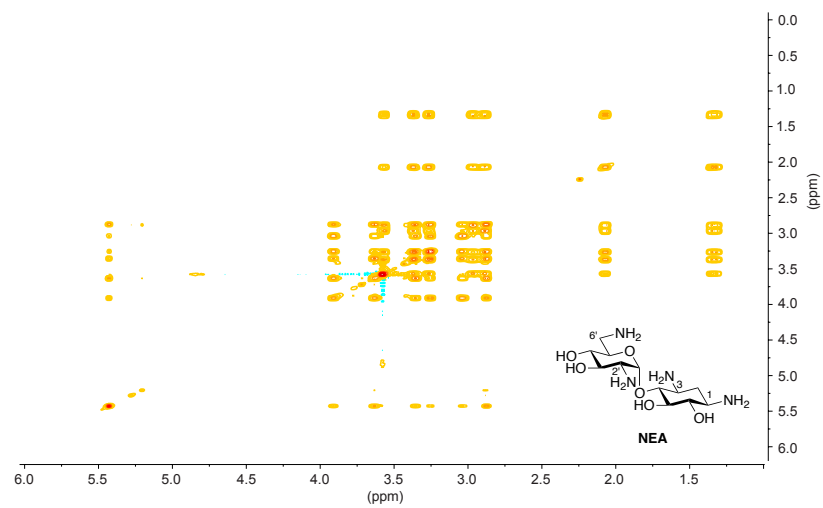

**Fig. S7.** zTOCSY of NEA in 1.2:8.8/ $\text{D}_2\text{O}$ : $\text{H}_2\text{O}$  at pH 7.5 (500 MHz).

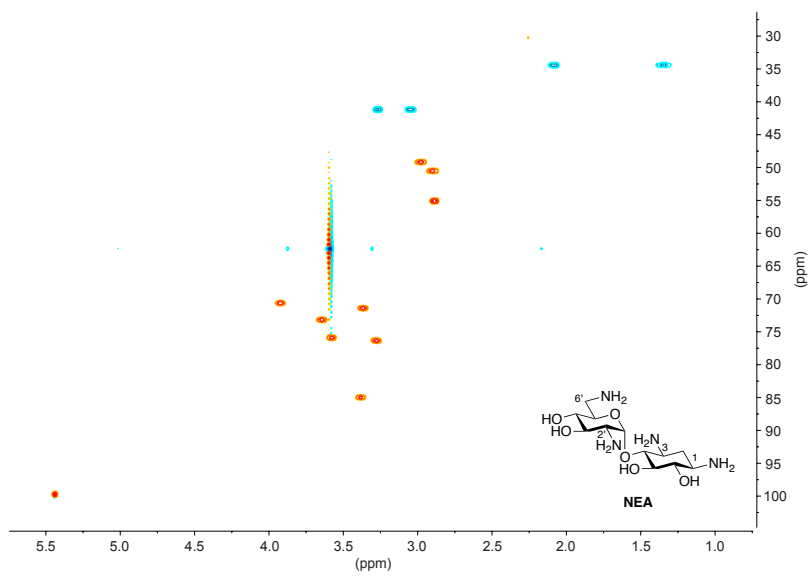

**Fig. S8.** gHSQC of NEA in 1.2:8.8/D<sub>2</sub>O:H<sub>2</sub>O at pH 7.5 (500 MHz).

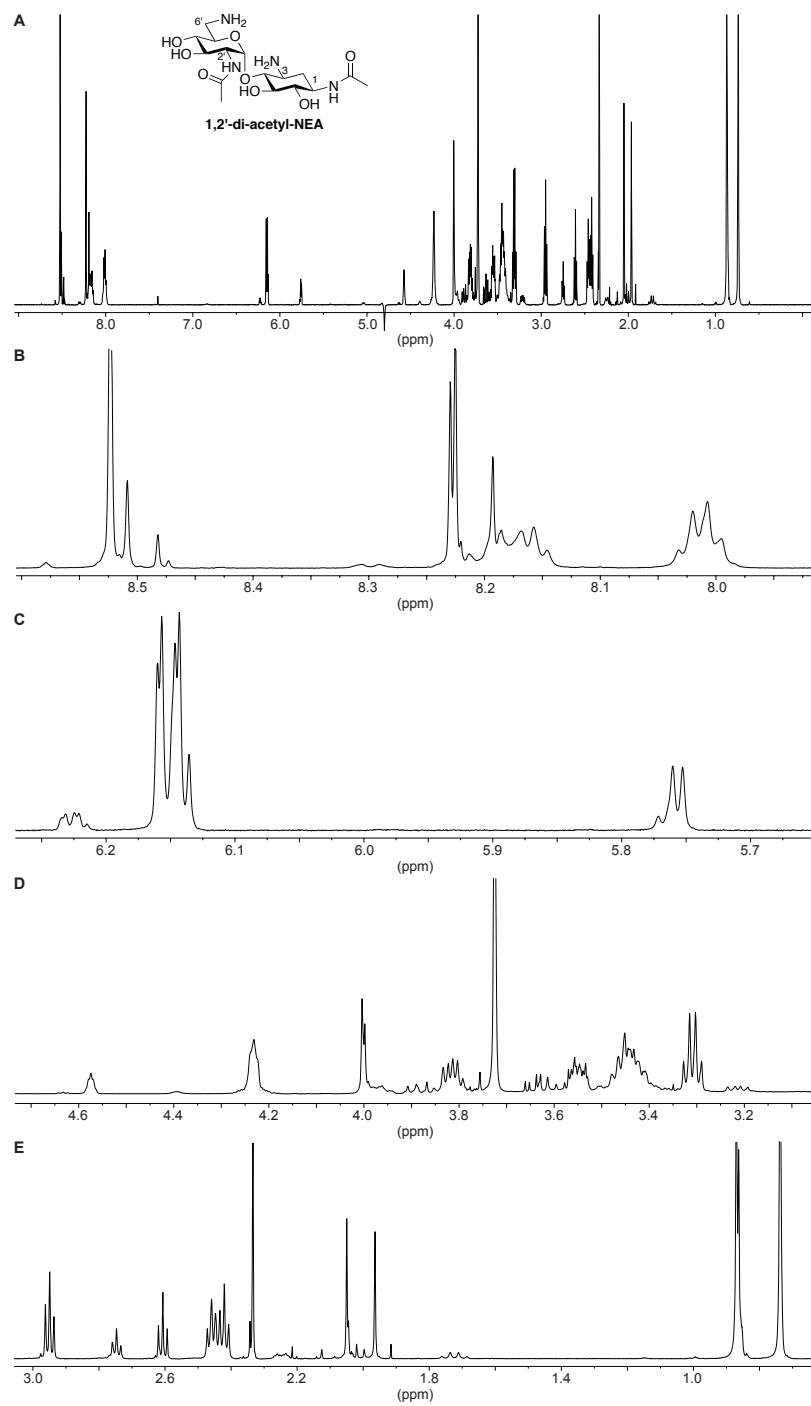

**Fig. S9.**  $^1\text{H}$  NMR of 1,2'-di-acetyl-NEA in 1.2:8.8/ $\text{D}_2\text{O}:\text{H}_2\text{O}$  at pH 7.5 (500 MHz). The full spectrum is shown in panel A and the expansions in panels B-D.

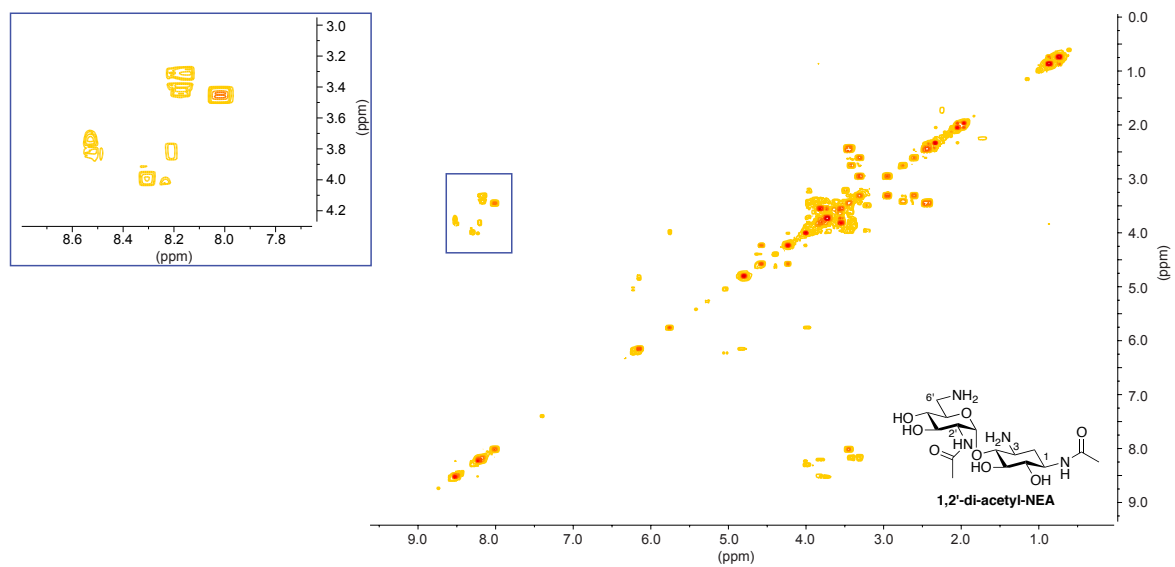

**Fig. S10.** gCOSY of 1,2'-di-acetyl-NEA in 1.2:8.8/D<sub>2</sub>O:H<sub>2</sub>O at pH 7.5 (500 MHz).

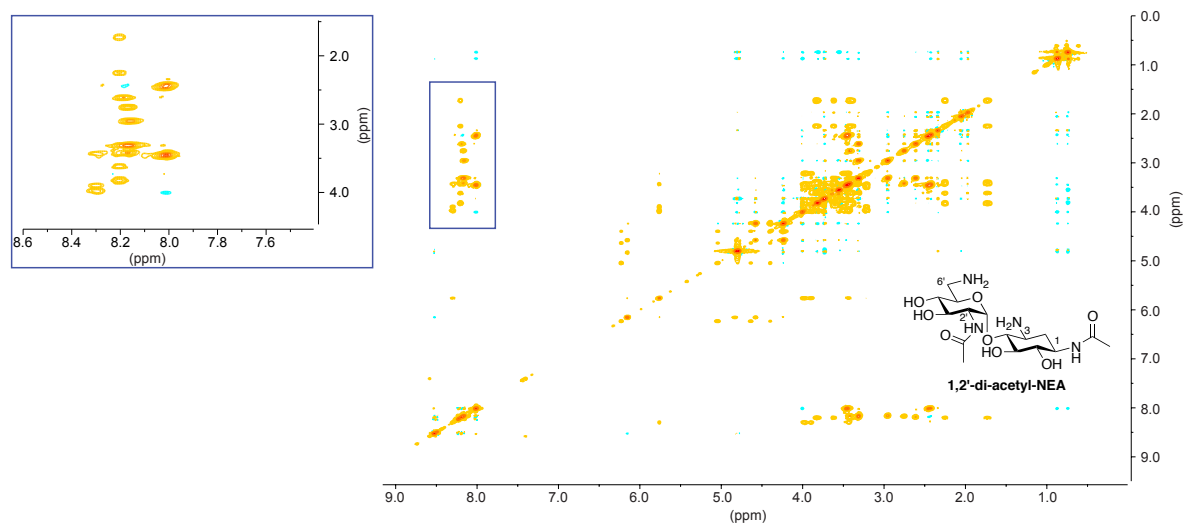

**Fig. S11.** zTOCSY of 1,2'-di-acetyl-NEA in 1.2:8.8/D<sub>2</sub>O:H<sub>2</sub>O at pH 7.5 (500 MHz).



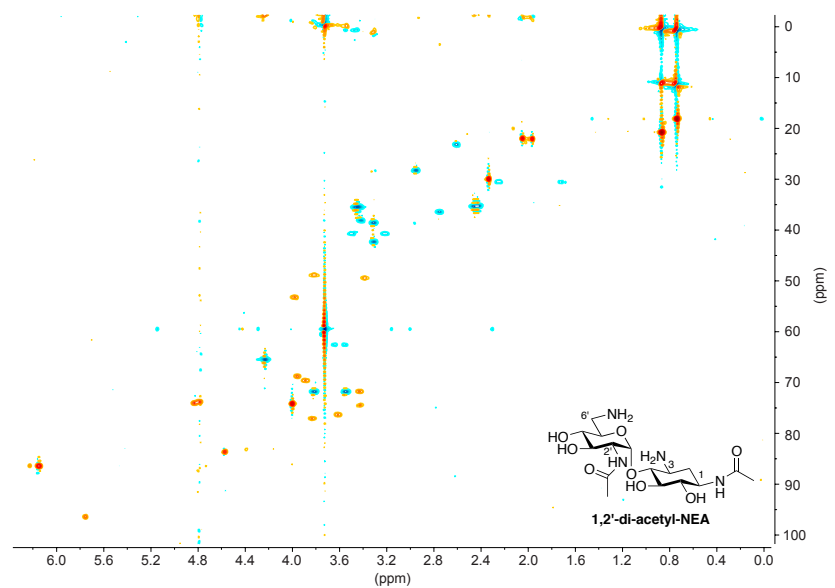

**Fig. S12.** gHSQC of 1,2'-di-acetyl-NEA in 1.2:8.8/D<sub>2</sub>O:H<sub>2</sub>O at pH 7.5 (500 MHz).
